# Supplementary material
Source: PubMed Central journal article supplement (PMC6648150)
Supplement: ao9b00767_si_001.pdf [file ao9b00767_si_001.pdf]

## Supporting Information

Quantitative Detection of Disappearance of Antioxidant Ability of Catechin by Near-Infrared Absorption and Near-Infrared Photoluminescence Spectra of Single-Walled Carbon Nanotubes

Kazuo Umemura<sup>\*†</sup>, Yu Ishibashi<sup>†</sup>, Masahiro Ito<sup>†</sup>, and Yoshikazu Homma<sup>†</sup>

<sup>†</sup>Department of Physics, Tokyo University of Science, 1-3 Kagurazaka, Shinjuku, Tokyo 162-8601, Japan

\*Correspondence: Kazuo Umemura  
Email: meicun2006@163.com  
Phone: +81-352288228

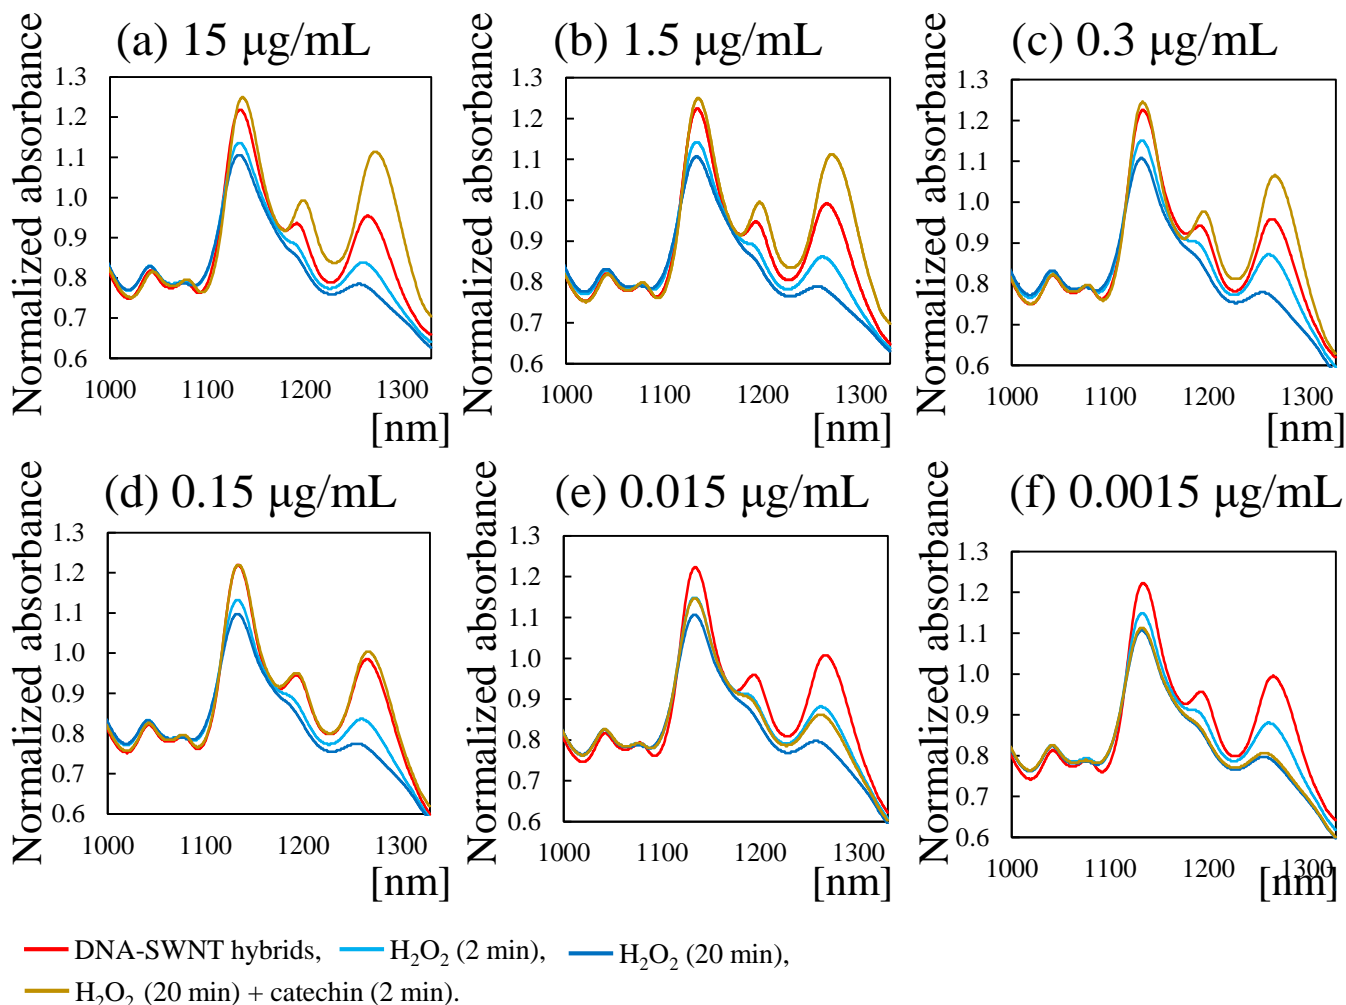

Figure S1. NIR absorbance spectra of DNA-SWNT hybrids in the presence or absence of H<sub>2</sub>O<sub>2</sub> and catechin. Catechin concentration ranged from 0 to 15  $\mu\text{g/mL}$ . (a) 15  $\mu\text{g/mL}$ , (b) 1.5  $\mu\text{g/mL}$ , (c) 0.3  $\mu\text{g/mL}$ , (d) 0.15  $\mu\text{g/mL}$ , (e) 0.015  $\mu\text{g/mL}$ , (f) 0.0015  $\mu\text{g/mL}$ . Red line: initial DNA-SWNT suspension without adding H<sub>2</sub>O<sub>2</sub> and catechin. Sky blue line: oxidized with 0.03% H<sub>2</sub>O<sub>2</sub> for 2 min. Dark blue line: oxidized with 0.03% H<sub>2</sub>O<sub>2</sub> for 20 min. Gold line: incubated with catechin for 2 min after oxidizing with H<sub>2</sub>O<sub>2</sub> for 20 min.

Figure S1.

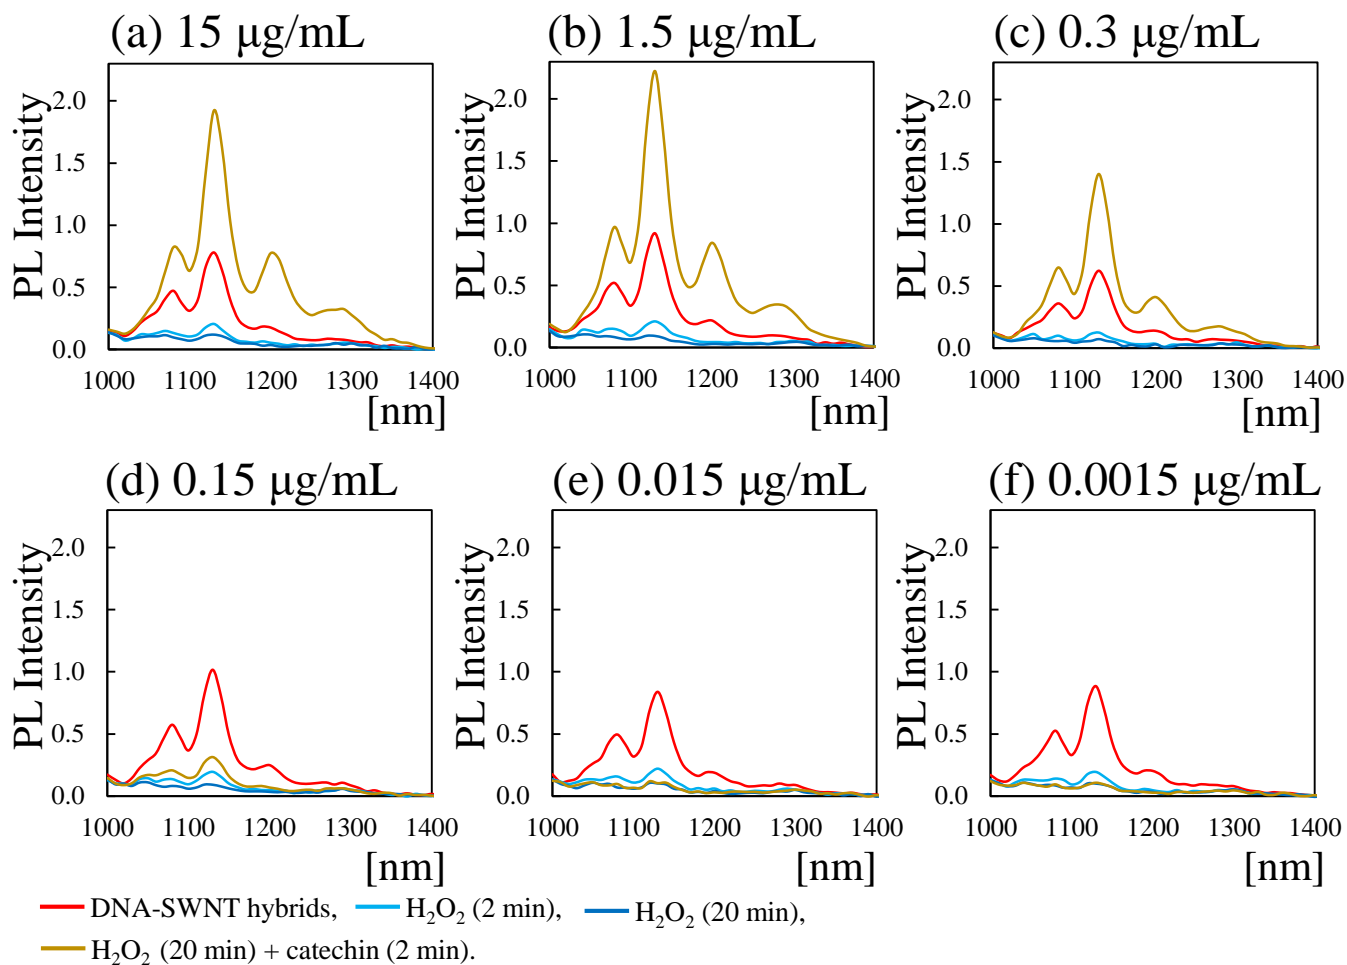

Figure S2. NIR PL spectra of DNA-SWNT hybrids in the presence or absence of catechin. Excitation wavelength was 730 nm. Catechin concentration ranged from 0 to 15  $\mu\text{g/mL}$ . (a) 15  $\mu\text{g/mL}$ , (b) 1.5  $\mu\text{g/mL}$ , (c) 0.3  $\mu\text{g/mL}$ , (d) 0.15  $\mu\text{g/mL}$ , (e) 0.015  $\mu\text{g/mL}$ , (f) 0.0015  $\mu\text{g/mL}$ . Red line: initial DNA-SWNT suspension without adding  $\text{H}_2\text{O}_2$  and catechin. Sky blue line: oxidized with 0.03%  $\text{H}_2\text{O}_2$  for 2 min. Dark blue line: oxidized with 0.03%  $\text{H}_2\text{O}_2$  for 20 min. Gold line: incubated with catechin for 2 min after oxidizing with  $\text{H}_2\text{O}_2$  for 20 min.

Figure S2

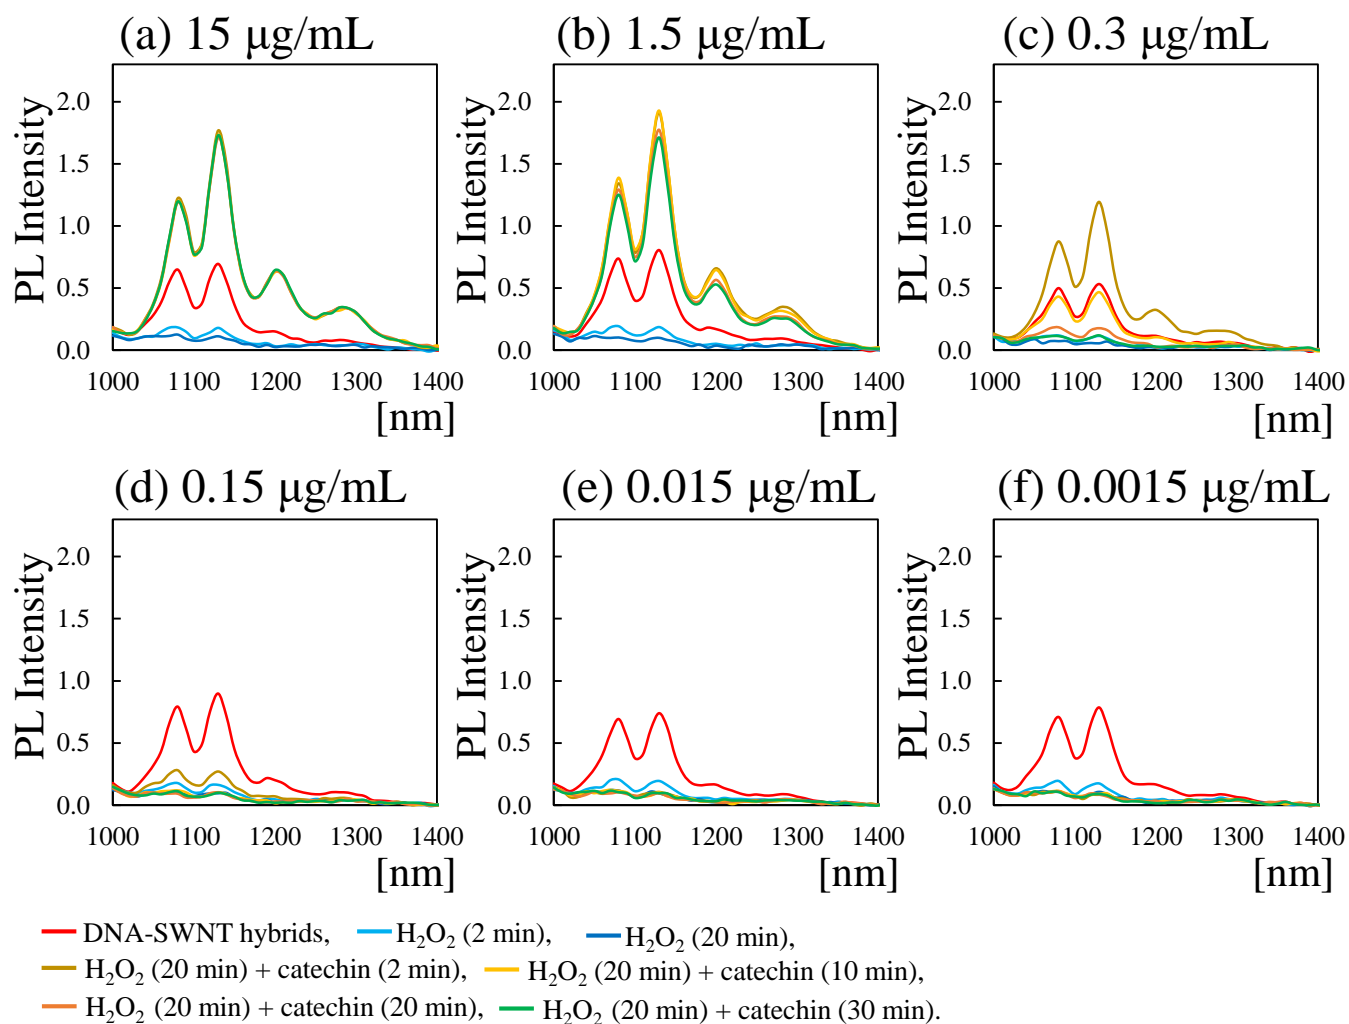

Figure S3. NIR PL spectra of DNA-SWNT hybrids in the presence or absence of catechin. Excitation wavelength was 740 nm. Catechin concentration ranged from 0 to 15  $\mu\text{g/mL}$ . (a) 15  $\mu\text{g/mL}$ , (b) 1.5  $\mu\text{g/mL}$ , (c) 0.3  $\mu\text{g/mL}$ , (d) 0.15  $\mu\text{g/mL}$ , (e) 0.015  $\mu\text{g/mL}$ , (f) 0.0015  $\mu\text{g/mL}$ . Red line: initial DNA-SWNT suspension without adding  $\text{H}_2\text{O}_2$  and catechin. Sky blue line: oxidized with 0.03%  $\text{H}_2\text{O}_2$  for 2 min. Dark blue line: oxidized with 0.03%  $\text{H}_2\text{O}_2$  for 20 min. Gold line: incubated with catechin for 2 min after oxidizing with  $\text{H}_2\text{O}_2$  for 20 min. Yellow line: incubated with catechin for 10 min after oxidizing with  $\text{H}_2\text{O}_2$  for 20 min. Orange line: incubated with catechin for 20 min after oxidizing with  $\text{H}_2\text{O}_2$  for 20 min. Green line: incubated with catechin for 30 min after oxidizing with  $\text{H}_2\text{O}_2$  for 20 min.

Figure S3

| Catechin Concentration [mg/mL] |  | Initial   |       | H <sub>2</sub> O <sub>2</sub> , 2 min |      | H <sub>2</sub> O <sub>2</sub> , 20 min |      | Catechin, 2 min |       | Catechin, 10 min |       | Catechin, 20 min |       | Catechin, 30 min |       |
|--------------------------------|--|-----------|-------|---------------------------------------|------|----------------------------------------|------|-----------------|-------|------------------|-------|------------------|-------|------------------|-------|
| 15(10, 2)                      |  | 0.54±0.09 | 100.0 | 0.13±0.03                             | 24.7 | 0.10±0.02                              | 18.5 | 1.03±0.15       | 190.7 | 0.99±0.15        | 183.3 | 0.97±0.14        | 179.6 | 0.95±0.15        | 175.9 |
| 1.5(10, 2)                     |  | 0.59±0.12 | 100.0 | 0.13±0.03                             | 22.0 | 0.08±0.01                              | 13.6 | 1.19±0.17       | 201.7 | 1.12±0.19        | 189.8 | 1.02±0.17        | 172.9 | 0.93±0.18        | 157.6 |
| 0.3(10, 2)                     |  | 0.47±0.02 | 100.0 | 0.11±0.01                             | 23.4 | 0.07±0.00                              | 14.9 | 0.89±0.01       | 189.4 | 0.46±0.03        | 97.9  | 0.20±0.01        | 42.6  | 0.13±0.01        | 27.7  |
| 0.15(10, 2)                    |  | 0.60±0.14 | 100.0 | 0.12±0.03                             | 20.0 | 0.08±0.02                              | 13.3 | 0.38±0.05       | 63.3  | 0.12±0.00        | 20.0  | 0.09±0.01        | 15.0  | 0.08±0.02        | 13.3  |
| 0.015(10, 2)                   |  | 0.56±0.12 | 100.0 | 0.13±0.04                             | 23.2 | 0.08±0.02                              | 14.3 | 0.11±0.04       | 19.6  | 0.09±0.02        | 16.1  | 0.08±0.01        | 14.3  | 0.08±0.02        | 14.3  |
| 0.0015(10, 2)                  |  | 0.67±0.02 | 100.0 | 0.17±0.04                             | 25.4 | 0.09±0.02                              | 13.4 | 0.11±0.02       | 16.4  | 0.10±0.02        | 14.9  | 0.10±0.02        | 14.9  | 0.11±0.01        | 16.4  |

Table S1. Numerical analysis of NIR PL spectra. Excitation wavelength was 740 nm.

Table S1
